# Supplementary material for: Survival associated with extent of radical hysterectomy in early-stage cervical cancer: a subanalysis of the Surveillance in Cervical CANcer (SCCAN) collaborative study
Source: PubMed Central journal article supplement (PMC10966343; doi:10.1016/j.ajog.2023.06.030), 2023-06-17
Supplement: NIHMS1973095-supplement-3.pdf [file NIHMS1973095-supplement-3.pdf]

SUPPLEMENTAL TABLE 1

## Cox regression univariate and multivariate analyses for overall survival on the entire group of 1257 patients

| OS               | Univariate<br>HR (95% CI) | Multivariate (all variables)<br>HR (95% CI) |
|------------------|---------------------------|---------------------------------------------|
| Age (y)          | <i>P</i> =.096            | <i>P</i> =.50                               |
| ≤45              | 1.00                      | 1.00                                        |
| >45              | 1.59 (0.92–2.73)          | 1.21 (0.69–2.14)                            |
| Stage            | <i>P</i> =.018            | <i>P</i> =.30                               |
| 1b1              | 1.00                      | 1.00                                        |
| 2a1              | 2.61 (1.18–5.78)          | 1.57 (0.67–3.65)                            |
| LVSI             | <i>P</i> =.002            | <i>P</i> =.11                               |
| No               | 1.00                      | 1.00                                        |
| Yes              | 2.40 (1.35–4.27)          | 1.66 (0.88–3.11)                            |
| Unknown          | 0.77 (0.31–1.94)          | 0.71 (0.28–1.80)                            |
| Grade            | <i>P</i> =.038            | <i>P</i> =.22                               |
| 1                | 1.00                      | 1.00                                        |
| 2                | 2.45 (0.59–10.16)         | 2.15 (0.50–9.19)                            |
| 3                | 4.50 (1.04–19.48)         | 3.16 (0.70–14.23)                           |
| Histology        | <i>P</i> =.20             | <i>P</i> =.35                               |
| SCC              | 1.00                      | 1.00                                        |
| Adenocarcinoma   | 0.83 (0.44–1.57)          | 1.17 (0.61–2.27)                            |
| Other            | 1.89 (0.84–4.26)          | 1.83 (0.80–4.18)                            |
| Adjuvant therapy | <i>P</i> <.0001           | <i>P</i> =.17                               |
| No               | 1.00                      | 1.00                                        |
| Yes              | 2.64 (1.56–4.48)          | 1.53 (0.83–2.82)                            |
| Diameter         | <i>P</i> <.0001           | <i>P</i> =.09                               |
| ≤20 mm           | 1.00                      | 1.00                                        |
| 21–40 mm         | 2.14 (1.25–3.67)          | 1.63 (0.92–2.89)                            |
| Class            | <i>P</i> =.78             | <i>P</i> =.46                               |
| Nerve sparing    | 1.00                      | 1.00                                        |
| Nonnerve sparing | 0.92 (0.50–1.69)          | 0.79 (0.42–1.47)                            |

CI, confidence interval; DSF, disease-free survival; HR, hazard ratio; LVSI, lymphovascular space invasion; OS, overall survival; RH, radical hysterectomy.

Bizzarri. Survival after different extent of radical hysterectomy in early-stage cervical cancer. *Am J Obstet Gynecol* 2023.

## SUPPLEMENTARY TABLE 2

## Pattern of recurrence in patients undergoing nerve-sparing vs non-nerve-sparing radical hysterectomy

| Variable        | Nerve sparing (n=88) | Nonnerve sparing (n=23) | P value          |
|-----------------|----------------------|-------------------------|------------------|
| Isolated        | 53 (60.2)            | 18 (78.3)               | .14 <sup>a</sup> |
| Multiple        | 33 (37.5)            | 5 (21.7)                |                  |
| Unknown         | 2 (2.3)              | 0 (0)                   |                  |
| Combined        | 19 (21.6)            | 5 (21.7)                | .99 <sup>a</sup> |
| Distant         | 29 (33.0)            | 8 (34.8)                |                  |
| Pelvic          | 38 (43.2)            | 10 (43.5)               |                  |
| Unknown         | 2 (2.3)              | 0 (0)                   |                  |
| Sites           |                      |                         |                  |
| Pelvic central  | 34                   | 10                      |                  |
| Pelvic lateral  | 11                   | 2                       |                  |
| Pelvic other    | 4                    | 3                       |                  |
| Abdominal liver | 7                    | 4                       |                  |
| Abdominal other | 18                   | 5                       |                  |
| Thorax lungs    | 16                   | 6                       |                  |
| Thorax other    | 3                    | 1                       |                  |
| Bones           | 4                    | 0                       |                  |
| Brain           | 2                    | 0                       |                  |
| Scar port       | 1                    | 0                       |                  |
| Ovary           | 1                    | 0                       |                  |
| Other distant   | 5                    | 1                       |                  |

<sup>a</sup> Calculated without considering unknown values.

Bizzarri. Survival after different extent of radical hysterectomy in early-stage cervical cancer. *Am J Obstet Gynecol* 2023.

## SUPPLEMENTARY TABLE 3

## Pattern of recurrence in patients undergoing nerve-sparing vs non-nerve-sparing radical hysterectomy after propensity match analysis

| Variables       | Nerve sparing (n=48) | Nonnerve sparing (n=23) | P value          |
|-----------------|----------------------|-------------------------|------------------|
| Isolated        | 34 (70.8)            | 18 (78.3)               | .69 <sup>a</sup> |
| Multiple        | 12 (25.0)            | 5 (21.7)                |                  |
| Unknown         | 2 (4.2)              | 0 (0)                   |                  |
| Combined        | 8 (16.7)             | 5 (21.7)                | .70 <sup>a</sup> |
| Distant         | 13 (27.1)            | 8 (34.8)                |                  |
| Pelvic          | 25 (52.1)            | 10 (43.5)               |                  |
| Unknown         | 2 (4.2)              | 0 (0)                   |                  |
| Sites           |                      |                         |                  |
| Pelvic central  | 18                   | 10                      |                  |
| Pelvic lateral  | 6                    | 2                       |                  |
| Pelvic other    | 0                    | 3                       |                  |
| Abdominal liver | 1                    | 4                       |                  |
| Abdominal other | 11                   | 5                       |                  |
| Thorax lungs    | 6                    | 6                       |                  |
| Thorax other    | 0                    | 1                       |                  |
| Bones           | 1                    | 0                       |                  |
| Brain           | 1                    | 0                       |                  |
| Scar port       | 1                    | 0                       |                  |
| Other distant   | 2                    | 1                       |                  |

<sup>a</sup> Calculated without considering unknown values.

Bizzarri. Survival after different extent of radical hysterectomy in early-stage cervical cancer. *Am J Obstet Gynecol* 2023.
